# Supplementary material
Source: PubMed Central journal article supplement (PMC3150934)
Supplement: 1107332108_pnas.201107332SI.pdf [file 1107332108_pnas.201107332SI.pdf]

# Supporting Information

Liu et al. 10.1073/pnas.1107332108

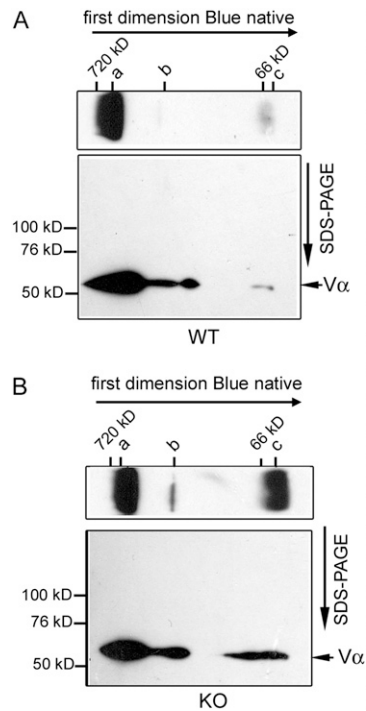

**Fig. S1.** 2D BN-PAGE/SDS/PAGE/Western blot analyses of mitochondrial proteins from *WT* (A) or *Pink1-KO* (B) flies. We first resolved *WT* mitochondrial proteins by BN-PAGE as shown in Fig. 4A. Following electrophoresis, we excised lane 1: *WT* from the gel, rotated this lane 90° counterclockwise and placed it on top of an SDS polyacrylamide gel for further resolution by SDS/PAGE. After SDS/PAGE, proteins were transferred to a PVDF membrane and probed with F1  $\alpha$  subunit antibody. The results demonstrated that the 600 kDa (a), 400 kDa (b), and 55 kDa (c) bands contained the  $\alpha$  subunits and, therefore, correspond to complex V, F1 subcomplex, and F1  $\alpha$  monomer, respectively. (B) Similar to the experiment described in A, lane 2 of Fig. 4A gel (containing proteins from *PINK1-KO* fly mitochondria) was used. The results confirmed again that the 600-, 400-, and 55-kDa bands contained F1 $\alpha$  subunit and, therefore, are complex V, F1 subcomplex, and the monomer, respectively. More importantly, compared with the *WT* in A, complex V assembly is inefficient in *PINK1-KO* fly mitochondria, because of an increase of F1 subcomplex and F1 $\alpha$  monomer.
